# Supplementary material for: Short-Term Effects of “Polish Smog” on Cardiovascular Mortality in the Green Lungs of Poland: A Case-Crossover Study with 4,500,000 Person-Years (PL-PARTICLES Study)
Source: MDPI journal article supplement (doi:10.3390/atmos12101270), 2021-09-29

Table S1. Crude cause-specific cardiovascular mortality in studied cities 2008–2017.

|                                 | Białystok        | Łomża        | Suwałki      | P      |
|---------------------------------|------------------|--------------|--------------|--------|
|                                 | 34005            | 8082         | 7486         |        |
| Cardiovascular disease, % (N)   | 40.73<br>(13851) | 39.94 (3328) | 36.37 (2723) | <0.001 |
| Acute coronary syndromes, % (N) | 14.11 (4799)     | 13.24 (1070) | 11.98 (897)  | <0.001 |
| Myocardial infarction, % (N)    | 3.80 (1293)      | 3.90 (315)   | 3.10 (232)   | 0.359  |
| Ischemic heart disease, % (N)   | 9.45 (3213)      | 9.07 (733)   | 8.46 (633)   | <0.001 |
| Unstable angina, % (N)          | 0.86 (293)       | 0.27 (22)    | 0.43 (32)    | <0.001 |
| Cerebrovascular disease, % (N)  | 11.12 (3780)     | 11.92 (963)  | 8.10 (606)   | <0.001 |
| Cerebral infarction, % (N)      | 8.02 (2727)      | 9.21 (744)   | 5.77 (432)   | <0.001 |
| Cerebral hemorrhage, % (N)      | 3.10 (1053)      | 2.71 (219)   | 2.32 (174)   | 0.021  |
| Other cardiovascular, % (N)     | 15.5 (5272)      | 16.02 (1295) | 16.3 (1220)  | <0.001 |
| Heart disease, % (N)            | 4.24 (1443)      | 3.53 (285)   | 4.97 (372)   | <0.001 |
| Hypertensive disease, % (N)     | 1.00 (341)       | 1.78 (144)   | 2.24 (168)   | <0.001 |
| Heart failure, % (N)            | 2.07 (703)       | 3.41 (276)   | 1.88 (141)   | <0.001 |
| Pulmonary embolism, % (N)       | 0.73 (248)       | 0.78 (63)    | 1.06 (79)    | <0.001 |
| Cardiomyopathy, % (N)           | 0.48 (163)       | 0.33 (27)    | 0.63 (47)    | 0.005  |
| Pulmonary hypertension, % (N)   | 0.40 (137)       | 0.31 (25)    | 0.47 (35)    | 0.113  |
| Aortic valve disorders, % (N)   | 0.48 (163)       | 0.27 (22)    | 0.41 (31)    | <0.001 |
| Dissection of aorta, % (N)      | 0.83 (282)       | 0.42 (34)    | 0.40 (30)    | <0.001 |
| Other, % (N)                    | 5.27 (1792)      | 5.18 (419)   | 4.23 (317)   | <0.001 |

Table S2. Time-stratified case-crossover model for cities included in the meta-analysis. The odds ratio of cardiovascular mortality with interquartile-range increase in exposure to air pollutants.

|     | Białystok                    |                              |                                |                               | Łomża           |                 |                   |                  | Suwałki           |                  |
|-----|------------------------------|------------------------------|--------------------------------|-------------------------------|-----------------|-----------------|-------------------|------------------|-------------------|------------------|
|     | SO <sub>2</sub> <sup>d</sup> | NO <sub>2</sub> <sup>a</sup> | PM <sub>2.5</sub> <sup>b</sup> | PM <sub>10</sub> <sup>c</sup> | SO <sub>2</sub> | NO <sub>2</sub> | PM <sub>2.5</sub> | PM <sub>10</sub> | PM <sub>2.5</sub> | PM <sub>10</sub> |
| LAG | 0.94                         | 1.02                         | 1.03                           | 1.03                          | 1.02            | 1.03            | 1.03              | 1.03             | 1.10              | 1.05             |
|     | 0.78-1.15                    | 0.99-1.04                    | 1.01-1.06                      | 1.01-1.05                     | 0.96-1.09       | 0.97-1.09       | 1.00-1.06         | 0.98-1.08        | 1.01-1.2          | 1.00-1.11        |
|     | P=0.56                       | P=0.26                       | P=0.02                         | P=0.01                        | P=0.50          | P=0.35          | P=0.04            | P=0.23           | P=0.03            | P=0.053          |
| P*  | 0.99                         | 0.78                         | 0.56                           | <0.001                        | 0.71            | 0.76            | 0.37              | 0.17             | 0.63              | 0.80             |
| LAG | 0.98                         | 1.02                         | 1.02                           | 1.01                          | 1.02            | 1.01            | 1.02              | 1.04             | 1.04              | 1.00             |
|     | 0.8-1.19                     | 0.99-1.05                    | 0.99-1.05                      | 0.99-1.04                     | 0.96-1.09       | 0.96-1.08       | 0.99-1.05         | 1.00-1.09        | 0.95-1.13         | 0.95-1.06        |
|     | P=0.81                       | P=0.12                       | P=0.12                         | P=0.29                        | P=0.54          | P=0.64          | P=0.15            | P=0.08           | P=0.42            | P=0.9            |
| P   | 0.16                         | 0.96                         | 0.18                           | 0.15                          | 0.81            | 0.40            | 0.98              | 0.90             | 0.96              | 0.83             |
| LAG | 0.89                         | 0.98                         | 1.01                           | 1.00                          | 0.99            | 1.03            | 1.00              | 1.02             | 1.01              | 1.03             |
|     | 0.73-1.08                    | 0.96-1.01                    | 0.98-1.03                      | 0.98-1.03                     | 0.93-1.05       | 0.98-1.1        | 0.97-1.03         | 0.97-1.06        | 0.93-1.1          | 0.98-1.08        |
|     | P=0.24                       | P=0.23                       | P=0.68                         | P=0.79                        | P=0.75          | P=0.27          | P=0.84            | P=0.5            | P=0.84            | P=0.27           |
| P   | 0.29                         | 1.00                         | 0.23                           | 0.97                          | 0.37            | 0.87            | 0.48              | 1.00             | 0.30              | 0.09             |
| LAG | 0.95                         | 0.98                         | 1.00                           | 1.00                          | 0.95            | 1.01            | 1.01              | 1.03             | 1.11              | 1.02             |
|     | 0.90-1.02                    | 0.95-1.01                    | 0.97-1.03                      | 0.98-1.02                     | 0.85-1.07       | 0.95-1.07       | 0.98-1.03         | 0.98-1.07        | 1.02-1.21         | 0.97-1.08        |
|     | P=0.14                       | P=0.13                       | P=0.94                         | P=0.94                        | P=0.43          | P=0.71          | P=0.74            | P=0.30           | P=0.02            | P=0.36           |
| P   | 0.49                         | 0.63                         | 0.88                           | 0.78                          | 0.39            | 0.99            | 0.13              | 0.47             | 0.30              | 0.048            |
| LAG | 0.94                         | 1.02                         | 1.04                           | 1.02                          | 1.03            | 1.03            | 1.04              | 1.04             | 1.08              | 1.04             |
|     | 0.77-1.15                    | 1.00-1.05                    | 1.01-1.07                      | 1.00-1.05                     | 0.96-1.1        | 0.97-1.09       | 1.01-1.07         | 1.00-1.09        | 0.99-1.18         | 0.98-1.09        |
|     | P=0.56                       | P=0.11                       | P=0.02                         | P=0.04                        | P=0.43          | P=0.33          | P=0.01            | P=0.07           | P=0.08            | P=0.17           |
|     | 0.31                         | 0.74                         | 0.70                           | 0.85                          | 0.94            | 0.97            | 0.32              | 0.43             | 0.65              | 0.52             |
| LAG | 0.82                         | 1.00                         | 1.04                           | 1.02                          | 1.01            | 1.04            | 1.03              | 1.05             | 1.10              | 1.05             |
|     | 0.65-1.02                    | 0.98-1.03                    | 1.00-1.07                      | 0.99-1.04                     | 0.94-1.08       | 0.98-1.11       | 1.00-1.07         | 1.00-1.1         | 1.00-1.21         | 0.99-1.1         |
|     | P=0.08                       | P=0.84                       | P=0.07                         | P=0.16                        | P=0.84          | P=0.22          | P=0.06            | P=0.08           | P=0.04            | P=0.11           |
| P   | 0.93                         | 0.59                         | 0.21                           | 0.81                          | 0.39            | 0.78            | 0.39              | 0.45             | 0.72              | 0.047            |

\* - P – value for differences in odds ratio between cold and warm seasons.

<sup>a</sup> nitrogen dioxide, <sup>b</sup> particulate matter with a diameter of 2.5 µm or less, <sup>c</sup> particulate matter with a diameter of 10 µm or less, <sup>d</sup> sulfur dioxide

Table S3. Time-stratified case-crossover model for cities included in the meta-analysis. The odds ratio of acute coronary syndromes mortality with interquartile-range increase in exposure to air pollutants.

|         | Białystok                    |                              |                                |                               | Łomża                       |                             |                             |                             | Suwałki                     |                             |
|---------|------------------------------|------------------------------|--------------------------------|-------------------------------|-----------------------------|-----------------------------|-----------------------------|-----------------------------|-----------------------------|-----------------------------|
|         | SO <sub>2</sub> <sup>d</sup> | NO <sub>2</sub> <sup>a</sup> | PM <sub>2.5</sub> <sup>b</sup> | PM <sub>10</sub> <sup>c</sup> | SO <sub>2</sub>             | NO <sub>2</sub>             | PM <sub>2.5</sub>           | PM <sub>10</sub>            | PM <sub>2.5</sub>           | PM <sub>10</sub>            |
| LAG 0   | 1.01<br>0.95-1.07<br>P=0.72  | 1.03<br>0.98-1.09<br>P=0.26  | 1.06<br>1.01-1.11<br>P=0.01    | 1.05<br>1.01-1.09<br>P=0.02   | 1.04<br>0.93-1.17<br>P=0.52 | 1.09<br>0.99-1.2<br>P=0.10  | 1.02<br>0.97-1.08<br>P=0.37 | 1.03<br>0.95-1.12<br>P=0.46 | 1.07<br>0.93-1.23<br>P=0.36 | 1.05<br>0.95-1.16<br>P=0.38 |
| * P     | 0.91                         | 0.70                         | 0.65                           | 0.27                          | 0.44                        | 0.53                        | 0.44                        | 0.03                        | 0.28                        | 0.54                        |
| LAG 1   | 1.01<br>0.95-1.08<br>P=0.68  | 1.03<br>0.97-1.08<br>P=0.39  | 1.05<br>1.01-1.10<br>P=0.03    | 1.02<br>0.98-1.06<br>P=0.39   | 1.02<br>0.91-1.15<br>P=0.71 | 1.02<br>0.93-1.13<br>P=0.66 | 1.01<br>0.96-1.06<br>P=0.79 | 1.05<br>0.97-1.14<br>P=0.26 | 0.98<br>0.85-1.14<br>P=0.83 | 0.99<br>0.89-1.1<br>P=0.83  |
| P       | 0.32                         | 0.96                         | 0.25                           | 0.14                          | 0.69                        | 0.95                        | 0.98                        | 0.90                        | 0.97                        | 0.79                        |
| LAG 2   | 0.98<br>0.92-1.04<br>P=0.52  | 0.98<br>0.93-1.04<br>P=0.54  | 1.02<br>0.97-1.07<br>P=0.48    | 1.02<br>0.98-1.06<br>P=0.37   | 1.00<br>0.89-1.12<br>P=0.97 | 1.0<br>0.9-1.1<br>P=0.94    | 0.99<br>0.94-1.04<br>P=0.55 | 1.03<br>0.95-1.12<br>P=0.53 | 1.00<br>0.87-1.16<br>P=0.95 | 1.08<br>0.97-1.19<br>P=0.15 |
| P       | 0.09                         | 0.20                         | 0.11                           | 0.18                          | 0.31                        | 0.71                        | 0.29                        | 0.37                        | 0.46                        | 0.46                        |
| LAG 3   | 0.95<br>0.9-1.02<br>P=0.14   | 0.97<br>0.92-1.03<br>P=0.31  | 0.99<br>0.94-1.03<br>P=0.56    | 0.99<br>0.95-1.03<br>P=0.46   | 0.95<br>0.85-1.07<br>P=0.43 | 1.03<br>0.93-1.13<br>P=0.58 | 1.01<br>0.97-1.07<br>P=0.58 | 1.06<br>0.98-1.15<br>P=0.15 | 1.07<br>0.93-1.24<br>P=0.36 | 1.06<br>0.96-1.18<br>P=0.23 |
| P       | 0.10                         | 0.11                         | 0.23                           | 0.48                          | 0.06                        | 0.48                        | 0.09                        | 0.87                        | 0.88                        | 0.08                        |
| LAG 0-1 | 1.01<br>0.95-1.08<br>P=0.73  | 1.05<br>0.99-1.11<br>P=0.10  | 1.06<br>1.01-1.12<br>P=0.01    | 1.04<br>0.99-1.08<br>P=0.08   | 1.03<br>0.92-1.17<br>P=0.59 | 1.07<br>0.97-1.19<br>P=0.16 | 1.02<br>0.97-1.07<br>P=0.48 | 1.05<br>0.97-1.15<br>P=0.23 | 1.04<br>0.89-1.21<br>P=0.65 | 1.02<br>0.92-1.13<br>P=0.75 |
|         | 0.34                         | 0.84                         | 0.39                           | 0.70                          | 0.70                        | 0.08                        | 0.73                        | 0.18                        | 0.47                        | 0.81                        |
| LAG 0-3 | 1.00<br>0.97-1.03<br>P=0.84  | 1.01<br>0.95-1.07<br>P=0.69  | 1.06<br>1.00-1.12<br>P=0.049   | 1.03<br>0.99-1.08<br>P=0.16   | 1.01<br>0.89-1.15<br>P=0.88 | 1.07<br>0.97-1.19<br>P=0.19 | 1.02<br>0.96-1.08<br>P=0.5  | 1.07<br>0.98-1.17<br>P=0.14 | 1.05<br>0.9-1.24<br>P=0.55  | 1.06<br>0.96-1.18<br>P=0.25 |
| P       | 0.06                         | 0.20                         | 0.21                           | 0.41                          | 0.52                        | 0.20                        | 0.84                        | 0.60                        | 0.43                        | 0.09                        |

\* - P – value for differences in odds ratio between cold and warm seasons.

<sup>a</sup> nitrogen dioxide, <sup>b</sup> particulate matter with a diameter of 2.5 µm or less, <sup>c</sup> particulate matter with a diameter of 10 µm or less, <sup>d</sup> sulfur dioxide

Table S4. Time-stratified case-crossover model for cities included in the meta-analysis. The odds ratio of cerebrovascular mortality with interquartile-range increase in exposure to air pollutants.

|         | Białystok                    |                              |                                |                               | Łomża                       |                             |                             |                             | Suwałki                     |                              |
|---------|------------------------------|------------------------------|--------------------------------|-------------------------------|-----------------------------|-----------------------------|-----------------------------|-----------------------------|-----------------------------|------------------------------|
|         | SO <sub>2</sub> <sup>d</sup> | NO <sub>2</sub> <sup>a</sup> | PM <sub>2.5</sub> <sup>b</sup> | PM <sub>10</sub> <sup>c</sup> | SO <sub>2</sub>             | NO <sub>2</sub>             | PM <sub>2.5</sub>           | PM <sub>10</sub>            | PM <sub>2.5</sub>           | PM <sub>10</sub>             |
| LAG 0   | 0.97<br>0.93-1.02<br>P=0.21  | 0.88<br>0.60-1.30<br>P=0.5   | 1.01<br>0.95-1.07<br>P=0.75    | 1.02<br>0.97-1.07<br>P=0.53   | 1.04<br>0.92-1.17<br>P=0.57 | 1.01<br>0.90-1.12<br>P=0.96 | 0.99<br>0.92-1.05<br>P=0.67 | 0.97<br>0.88-1.07<br>P=0.56 | 1.01<br>0.83-1.21<br>P=0.99 | 1.15<br>1.01-1.30<br>P=0.04  |
| * P     | 0.89                         | 0.41                         | 0.06                           | 0.36                          | 0.60                        | 0.82                        | 0.43                        | 0.82                        | 0.99                        | 0.72                         |
| LAG 1   | 0.98<br>0.93-1.02<br>P=0.31  | 1.41<br>0.98-2.04<br>P=0.07  | 0.98<br>0.93-1.05<br>P=0.6     | 0.99<br>0.90-1.11<br>P=0.91   | 0.97<br>0.87-1.09<br>P=0.67 | 1.02<br>0.92-1.14<br>P=0.69 | 1.04<br>0.99-1.08<br>P=0.15 | 1.01<br>0.94-1.09<br>P=0.77 | 1.47<br>0.28-1.78<br>P=0.65 | 1.10<br>0.98-1.23<br>P=0.09  |
| P       | 0.22                         | 0.93                         | 0.14                           | 0.54                          | 0.38                        | 0.66                        | 0.58                        | 0.38                        | 0.59                        | 0.41                         |
| LAG 2   | 0.79<br>0.25-2.52<br>P=0.69  | 1.67<br>0.78-3.58<br>P=0.19  | 1.37<br>0.47-2.26<br>P=0.38    | 0.95<br>0.24-3.78<br>P=0.95   | 0.85<br>0.08-1.89<br>P=0.42 | 1.06<br>0.95-1.18<br>P=0.32 | 1.11<br>0.82-1.51<br>P=0.49 | 0.48<br>0.01-1.05<br>P=0.78 | 0.83<br>0.68-1.01<br>P=0.06 | 1.101<br>0.98-1.23<br>P=0.08 |
| P       | 0.62                         | 0.41                         | 0.44                           | 0.81                          | 0.23                        | 0.45                        | 0.97                        | 0.99                        | 0.22                        | 0.55                         |
| LAG 3   | 0.85<br>0.27-2.73<br>P=0.79  | 1.05<br>0.96-1.13<br>P=0.25  | 1.06<br>0.93-1.22<br>P=0.38    | 1.00<br>0.87-1.15<br>P=0.99   | 0.85<br>0.08-1.89<br>P=0.43 | 1.08<br>0.87-1.35<br>P=0.49 | 1.07<br>0.79-1.46<br>P=0.66 | 0.94<br>0.56-1.56<br>P=0.8  | 1.11<br>0.90-1.38<br>P=0.34 | 1.12<br>0.99-1.27<br>P=0.07  |
| P       | 0.91                         | 0.57                         | 0.10                           | 0.71                          | 0.63                        | 0.15                        | 0.96                        | 0.68                        | 0.55                        | 0.54                         |
| LAG 0-1 | 0.96<br>0.77-1.22<br>P=0.76  | 1.10<br>0.95-1.28<br>P=0.2   | 1.12<br>0.85-1.47<br>P=0.41    | 0.99<br>0.76-1.32<br>P=0.99   | 0.93<br>0.01-1.85<br>P=0.43 | 1.11<br>0.81-1.52<br>P=0.52 | 1.23<br>0.69-2.18<br>P=0.5  | 0.87<br>0.32-1.61<br>P=0.79 | 1.18<br>0.91-1.52<br>P=0.22 | 1.17<br>1.02-1.4<br>P=0.03   |
|         | 0.91                         | 0.88                         | 0.40                           | 0.76                          | 0.28                        | 0.18                        | 0.56                        | 0.37                        | 0.74                        | 0.78                         |
| LAG 0-3 | 1.07<br>0.68-1.71<br>P=0.77  | 0.84<br>0.61-1.12<br>P=0.21  | 0.78<br>0.20-1.37<br>P=0.4     | 1.11<br>0.58-1.75<br>P=0.98   | 1.34<br>0.65-1.68<br>P=0.43 | 0.87<br>0.52-1.44<br>P=0.59 | 0.68<br>0.21-2.22<br>P=0.52 | 1.07<br>0.17-1.26<br>P=0.79 | 0.92<br>0.70-1.23<br>P=0.58 | 1.25<br>1.05-1.48<br>P=0.01  |
| P       | 0.90                         | 0.87                         | 0.42                           | 0.78                          | 0.45                        | 0.61                        | 0.60                        | 0.67                        | 0.65                        | 0.45                         |

\* - P – value for differences in odds ratio between cold and warm seasons.

<sup>a</sup> nitrogen dioxide, <sup>b</sup> particulate matter with a diameter of 2.5 µm or less, <sup>c</sup> particulate matter with a diameter of 10 µm or less, <sup>d</sup> sulfur dioxide

Figure S1. Panel chart. Changes in the concentrations of air pollutants and temperature in Białystok for analyzed period (the red line represents changes in the quartile of the year).

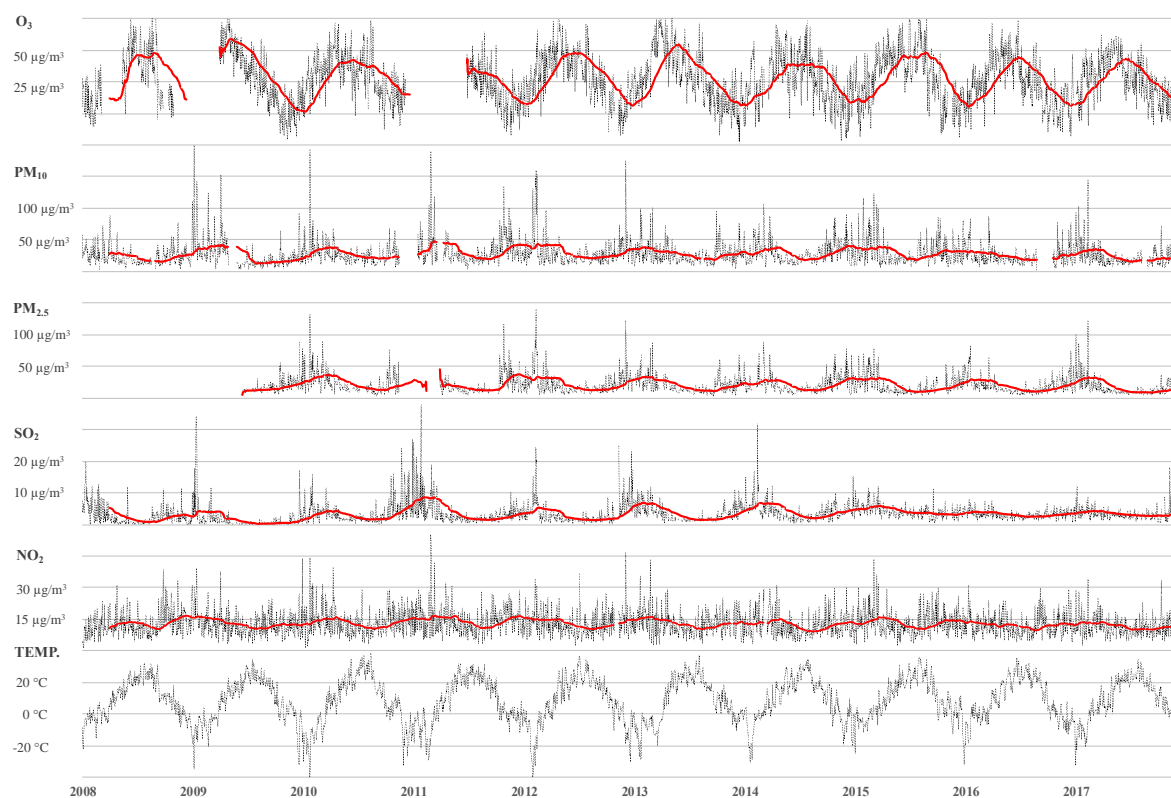

Figure S2. Panel chart. Changes in the concentrations of air pollutants and temperature in Łomża for analyzed period (the red line represents changes in the quartile of the year).

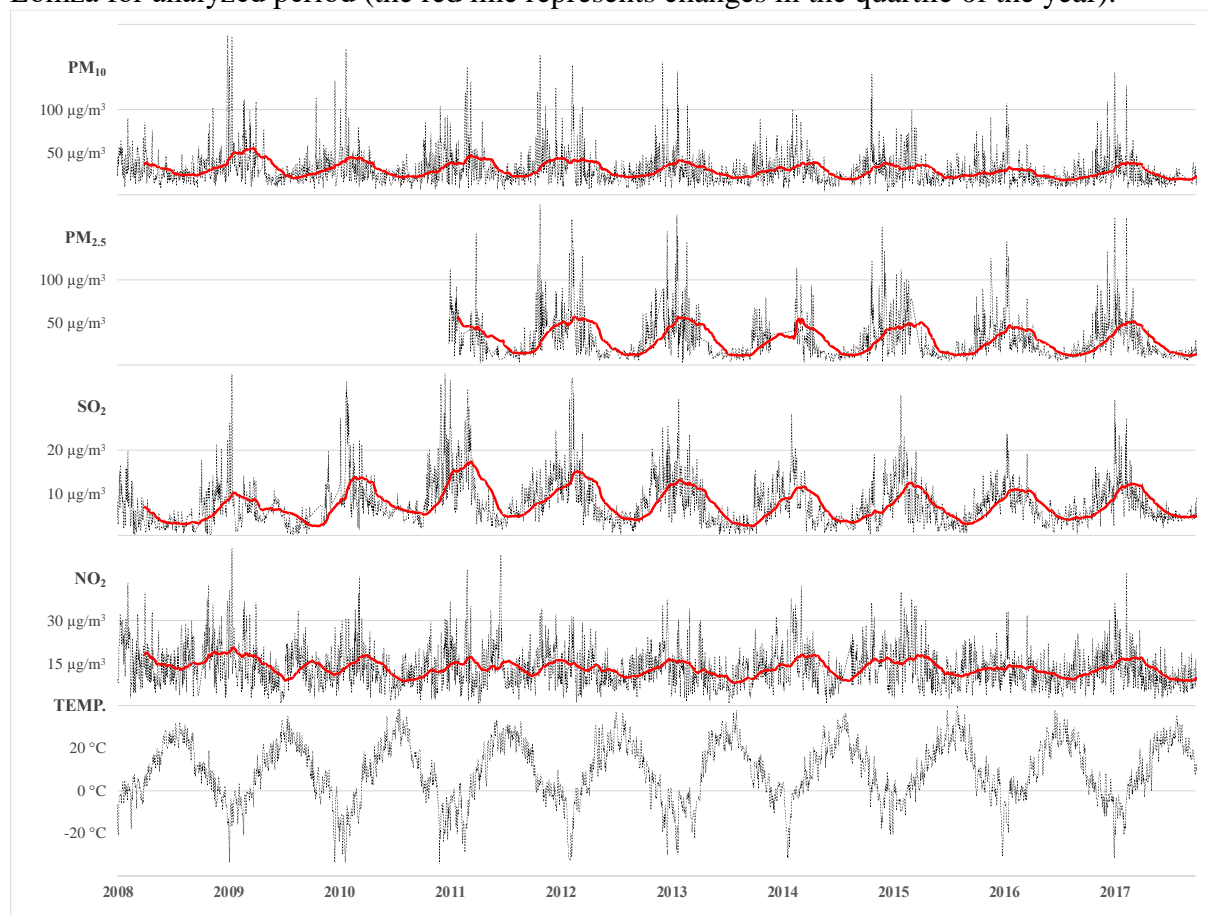

Figure S3. Panel chart. Changes in the concentrations of air pollutants and temperature in Suwałki for analyzed period (the red line represents changes in the quartile of the year).

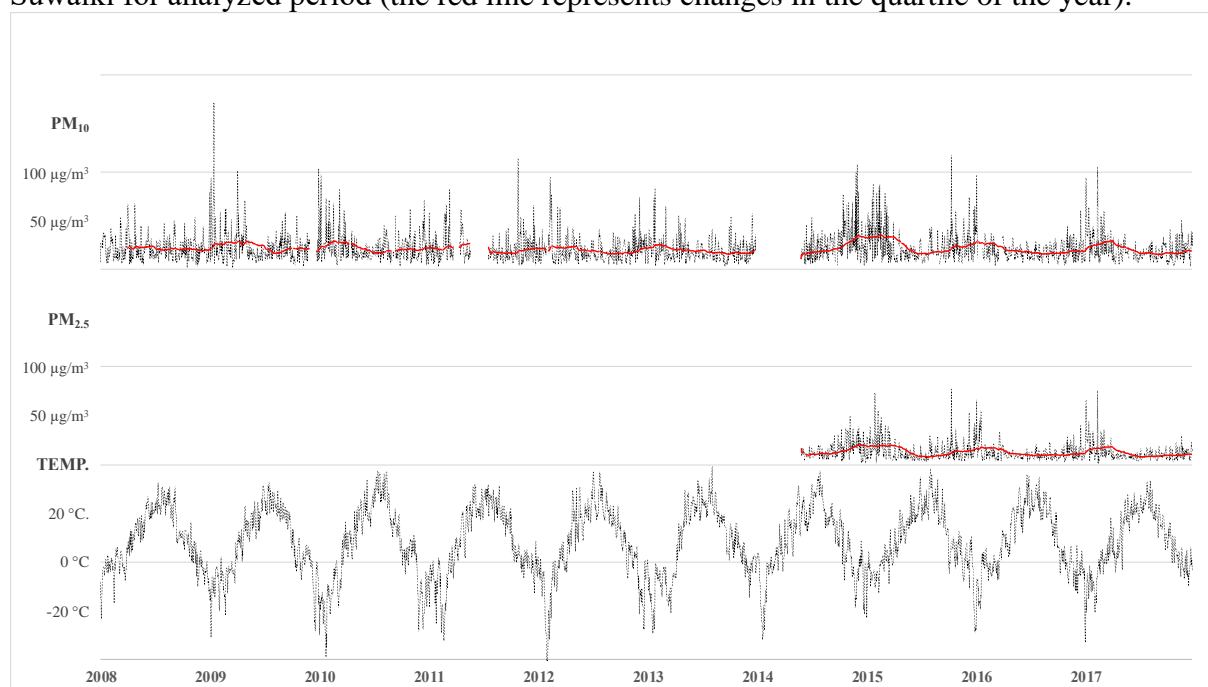

Figure S4. Meta-analysis results for associations between exposure to short-term nitrogen dioxide and cardiovascular-, acute coronary syndromes-, and cerebrovascular-related mortality.

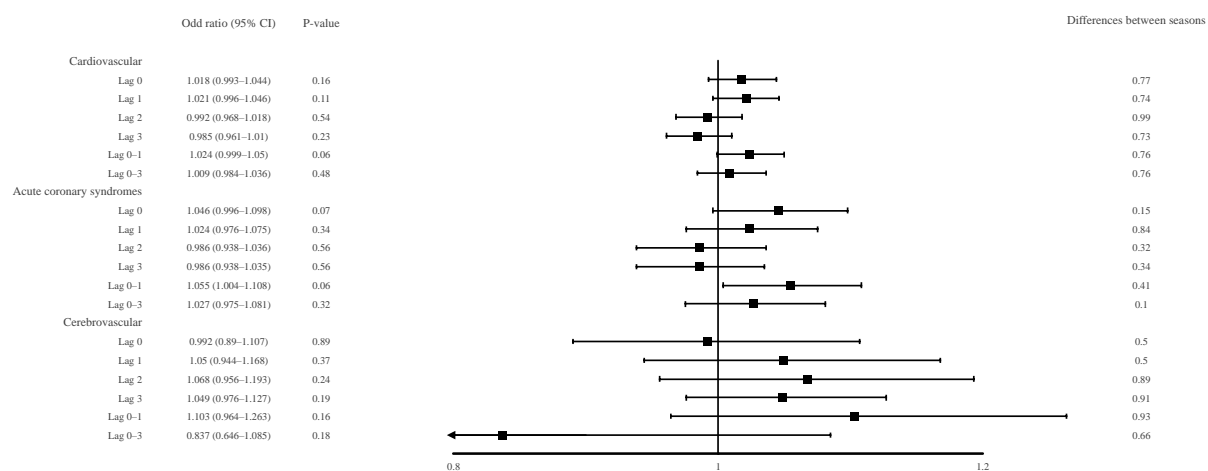

Figure S5. Meta-analysis results for associations between short-term exposure to sulfur dioxide and cardiovascular-, acute coronary syndromes-, and cerebrovascular-related mortality.

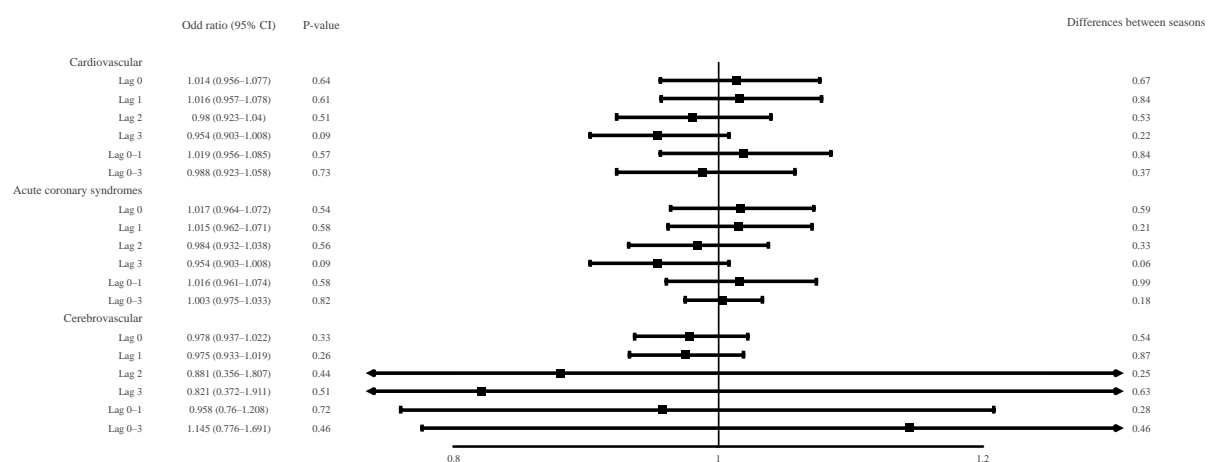

Supplement: s1 [file s1]
